# Supplementary material for: Genome-wide localization of exosome components to active promoters and chromatin insulators in Drosophila
Source: PubMed Central journal article supplement — Nucleic Acids Res. 2013 Jan 28;41(5):2963–80. doi: 10.1093/nar/gkt037 (PMC3597698; doi:10.1093/nar/gkt037), 2013-01-28

Lim\_Supplementary\_Fig\_S9

poly(A) RNA expression in S2 Rrp6 knockdown

A

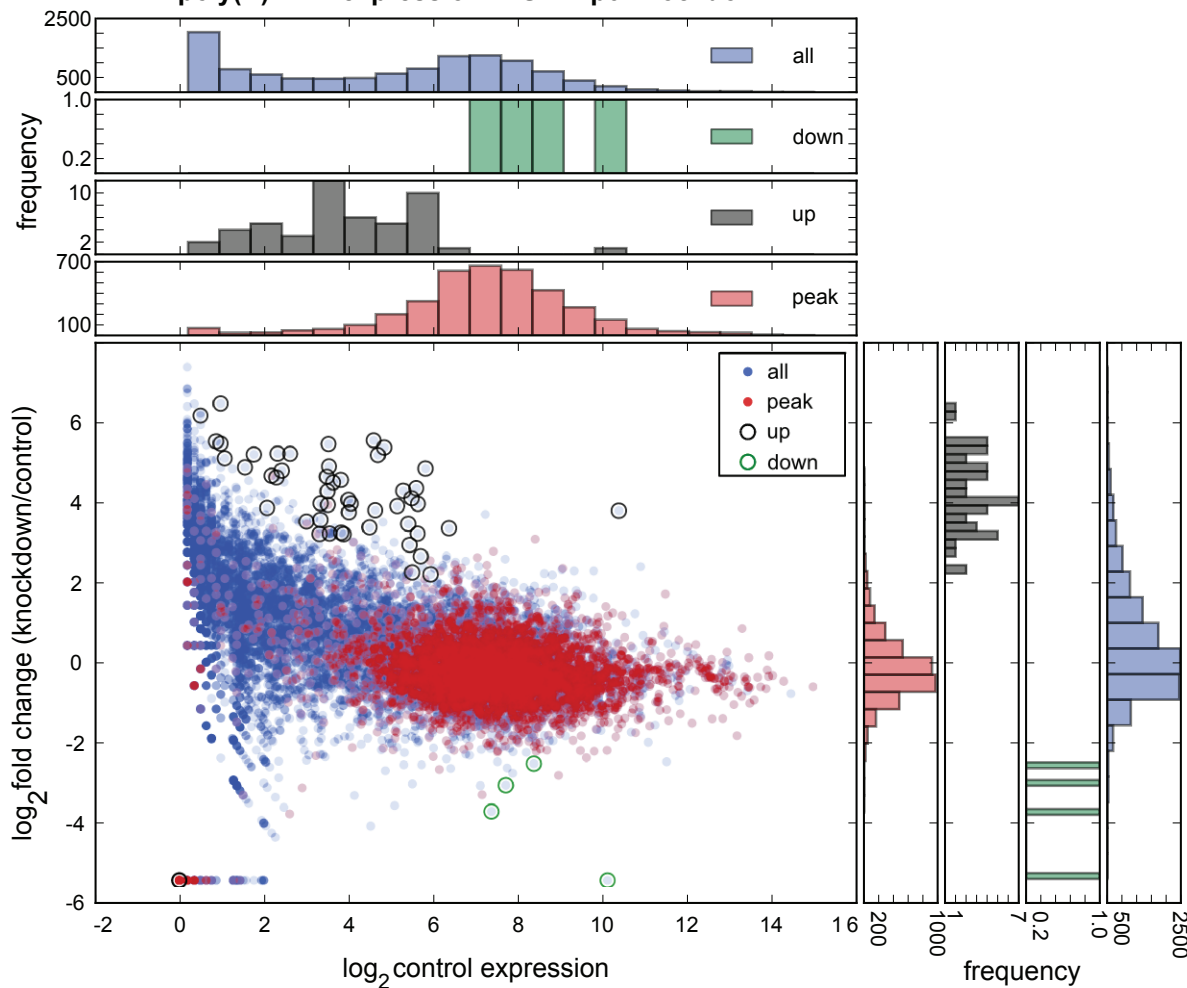

B

poly(A) RNA expression in S3 Rrp6 knockdown

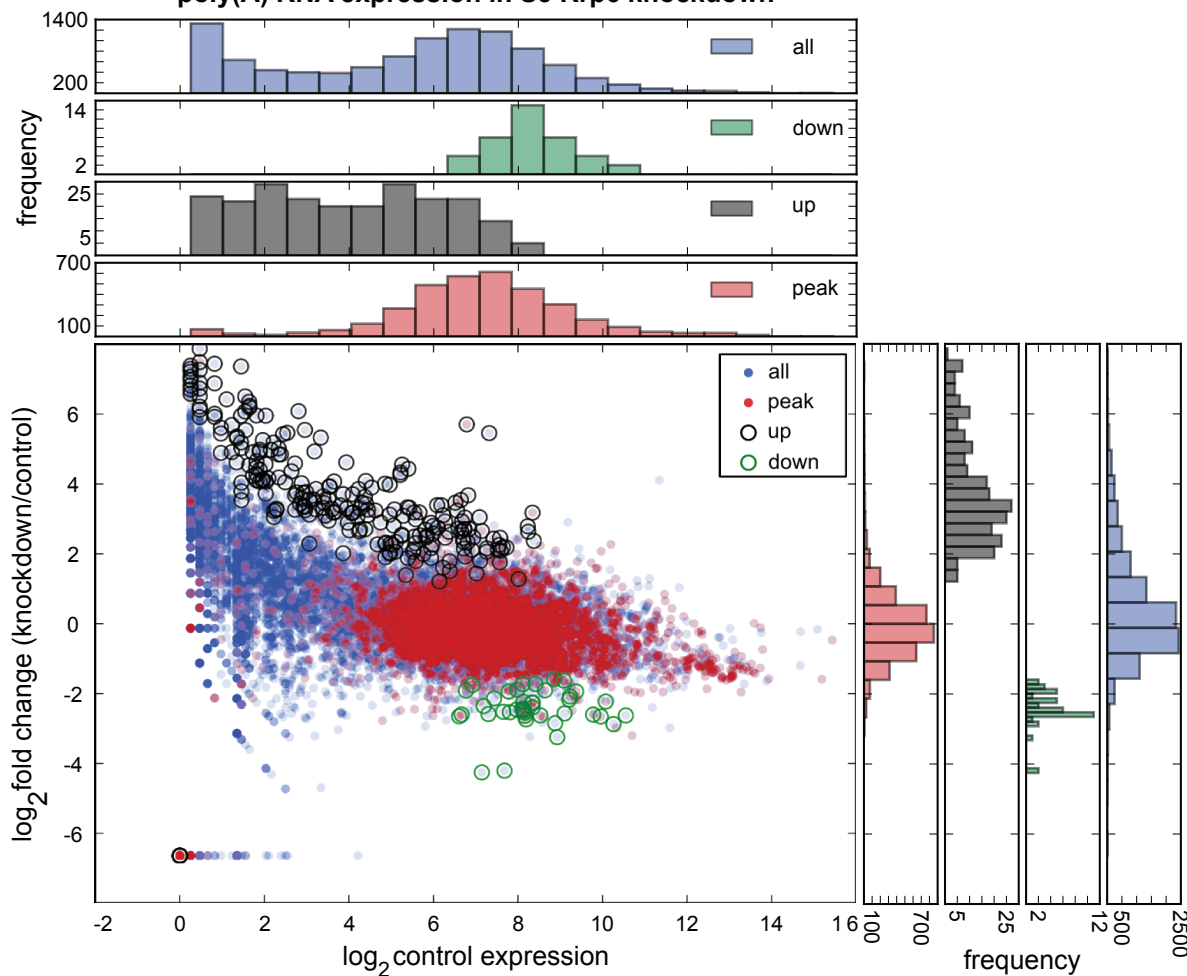

Supplement: supp_gkt037_nar-02944-a-2012-File009.pdf [file supp_gkt037_nar-02944-a-2012-File009.pdf]
